# Supplementary material for: Physicochemical perspectives (aggregation, structure and dynamics) of interaction between pluronic (L31) and surfactant (SDS)
Source: Royal Society of Chemistry journal article supplement (doi:10.1039/c5cp04910e), 2015-01-01
Supplement: c5cp04910e1.pdf [file c5cp04910e1.pdf]

**Electronic Supplementary Information (ESI)**

**Physicochemical perspectives (aggregation, structure and dynamics) of interaction between  
pluronic (L31) and surfactant (SDS)**

G. K. S. Prameela,<sup>a</sup> B. V. N. Phani Kumar,<sup>a</sup> A. Pan,<sup>b</sup> V. K. Aswal,<sup>c\*</sup> J. Subramanian,<sup>a</sup>  
A. B. Mandal,<sup>a\*</sup> and S. P. Moulik<sup>b\*</sup>

*<sup>a</sup>Chemical Physics Laboratory and Chemical Laboratory,*

*CSIR- Central Leather Research Institute, Adayar, Chennai-600020, India.*

*Phone: +91-44-2491-0846; Fax: +91-44-2491-2150*

*E-mail: [abmandal@hotmail.com](mailto:abmandal@hotmail.com), [abmandal@clri.res.in](mailto:abmandal@clri.res.in)*

*<sup>b</sup>Centre for Surface Science, Department of Chemistry, Jadavpur University,*

*Kolkata 700032, India.*

*Phone: +91-33-2414-6411; Fax: +91-33-2414-6266.*

*E-mail: [spmcss@yahoo.com](mailto:spmcss@yahoo.com)*

*<sup>c</sup>Solid State Physics Division, Bhabha Atomic Research Centre, Trombay, Mumbai- 400 085,  
India.*

*Phone: +91-22-2559-4642; Fax: +91-22-2550-5150*

### Electronic Supplementary Information (ESI)

Fig. S1:  $^1\text{H}$  chemical shifts of SDS for SDS (97 mM) / L31/  $\text{D}_2\text{O}$  relative to SDS (97 mM)/  $\text{D}_2\text{O}$

i.e.  $\Delta\delta (= \delta_{L31+SDS} - \delta_{\text{SDS}})$  as a function of L31 concentration.

Fig. S2: The EPR experimental (solid line) and simulated (dotted) spectra of the spin probe 5-DSA for the systems-a and b.

Microwave frequency = 9.692 GHz; field sweep width = 100 Gauss; center field = 3433.00

Gauss; field modulation frequency = 100 kHz; microwave power = 3.2 mW for all measurements.

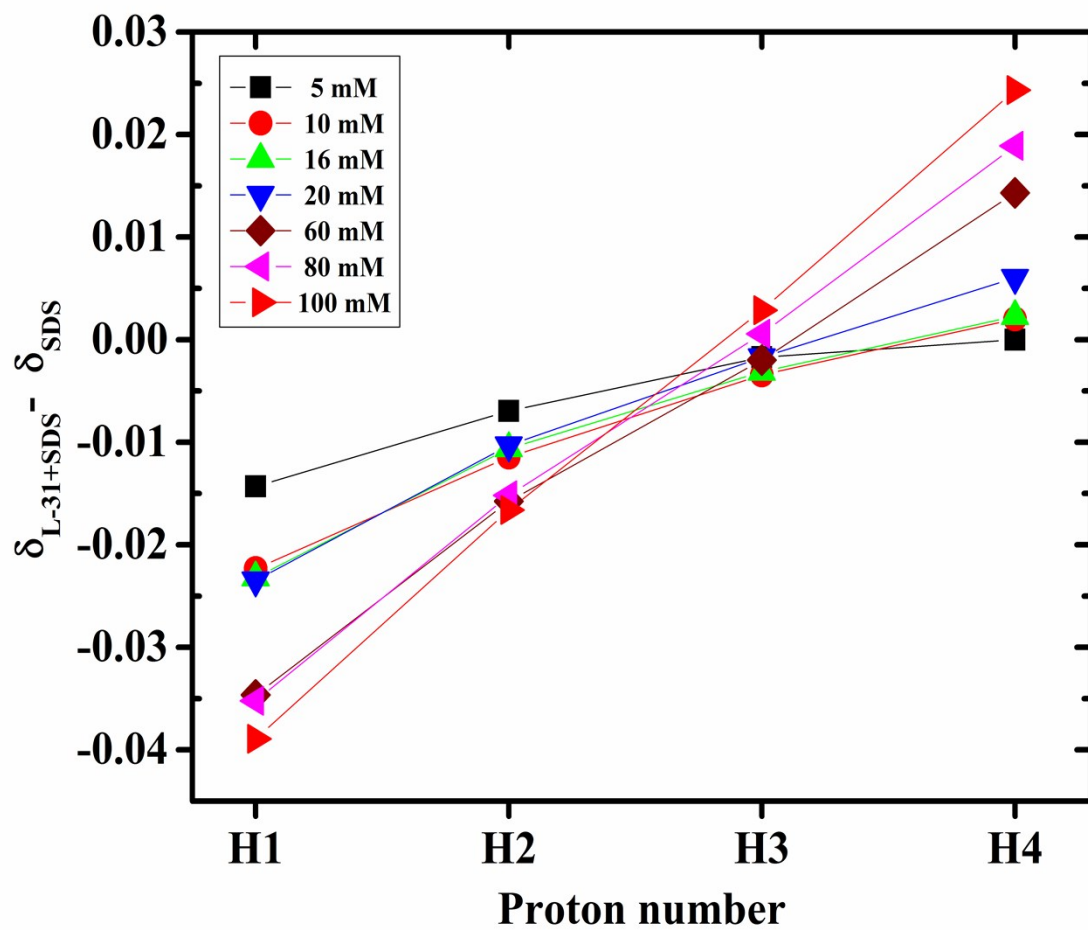

Fig. S1:  $^1\text{H}$  chemical shifts of SDS for SDS (97 mM) / L31/  $\text{D}_2\text{O}$  relative to SDS (97 mM)/  $\text{D}_2\text{O}$  i.e.  $\Delta\delta (= \delta_{\text{L31+SDS}} - \delta_{\text{SDS}})$  as a function of L31 concentration.

System a:

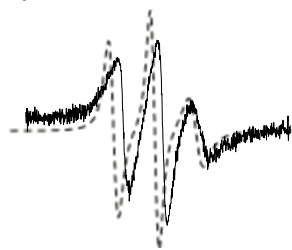

6mM SDS/H<sub>2</sub>O

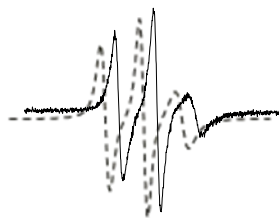

8mM SDS/H<sub>2</sub>O

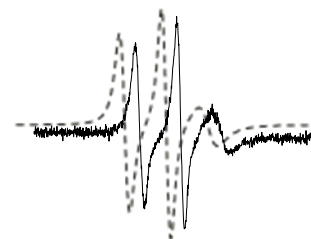

20mM SDS/H<sub>2</sub>O

System b:

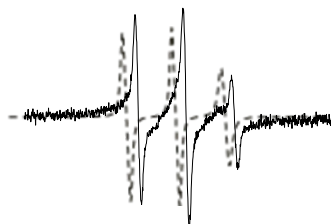

10mM L31/1mM SDS

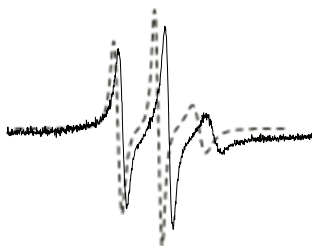

10mM L31/2mM SDS

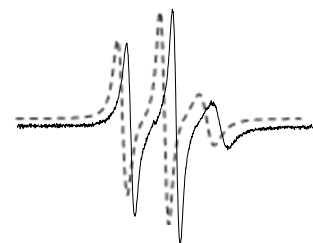

10mM L31/40mM SDS

Fig. S2: The EPR experimental (solid line) and simulated (dotted) spectra of the spin probe 5-DSA for the systems a and b.
